# Supplementary material
Source: PubMed Central journal article supplement (PMC7217405)
Supplement: ASN.2019070712SupplementaryData.pdf [file ASN.2019070712SupplementaryData.pdf]

## **TABLE OF CONTENTS:**

**Supplemental Figure S1**

**Supplemental Figure S2**

**Supplemental Figure S3**

**Supplemental Figure S4**

**Figure Legends**

**Supplemental Information**

*Supplemental Table 1. Primary antibodies*

*Supplemental Table 2. Secondary antibodies*

*Supplemental Table 3. List of primers for qPCR*

*Supplemental Table 4. Average numerical values of cystine measurements and protein concentration of iPSCs and kidney organoids.*

Supplemental Figure S1

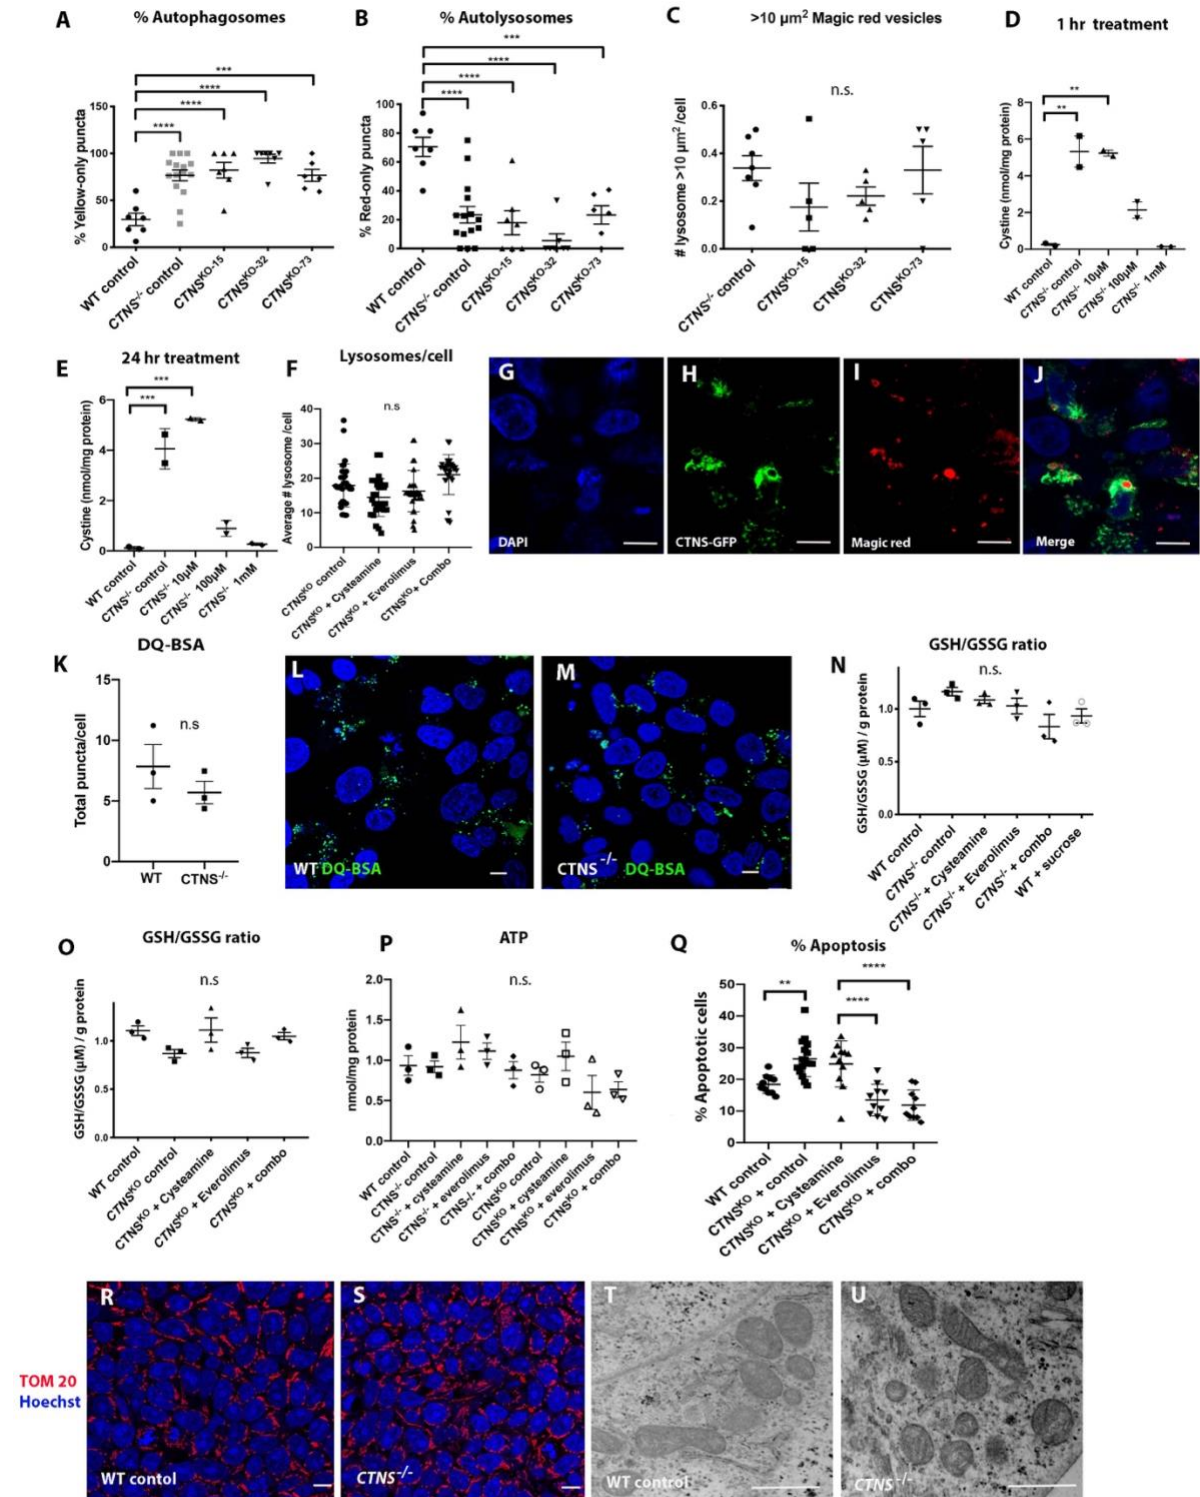

**Supplemental Figure S2**

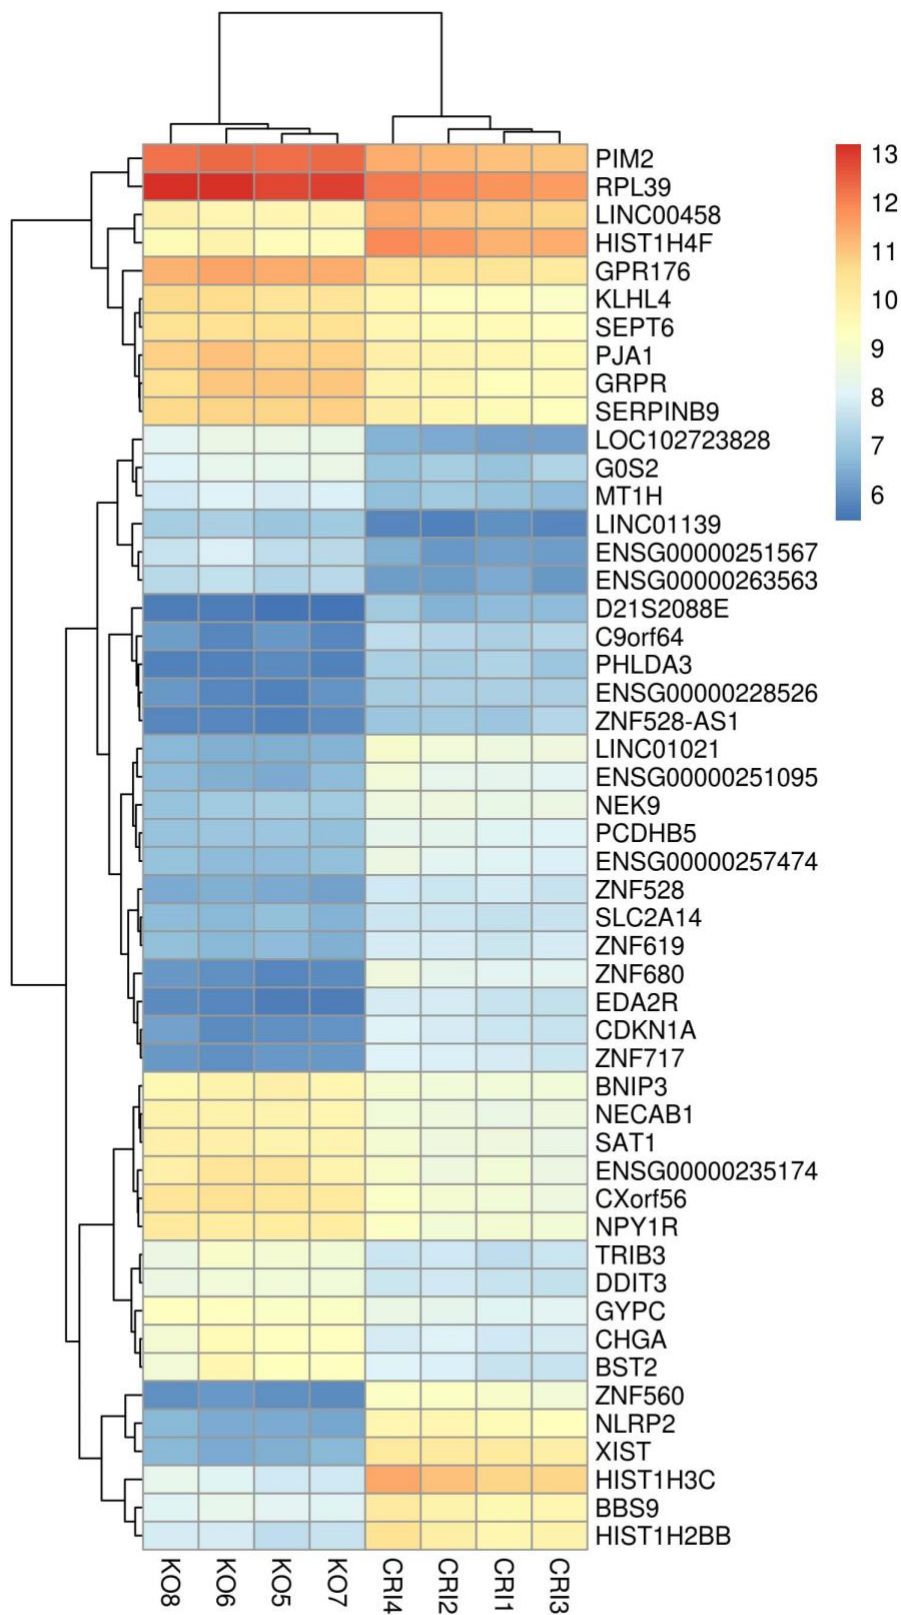

Supplemental Figure S3

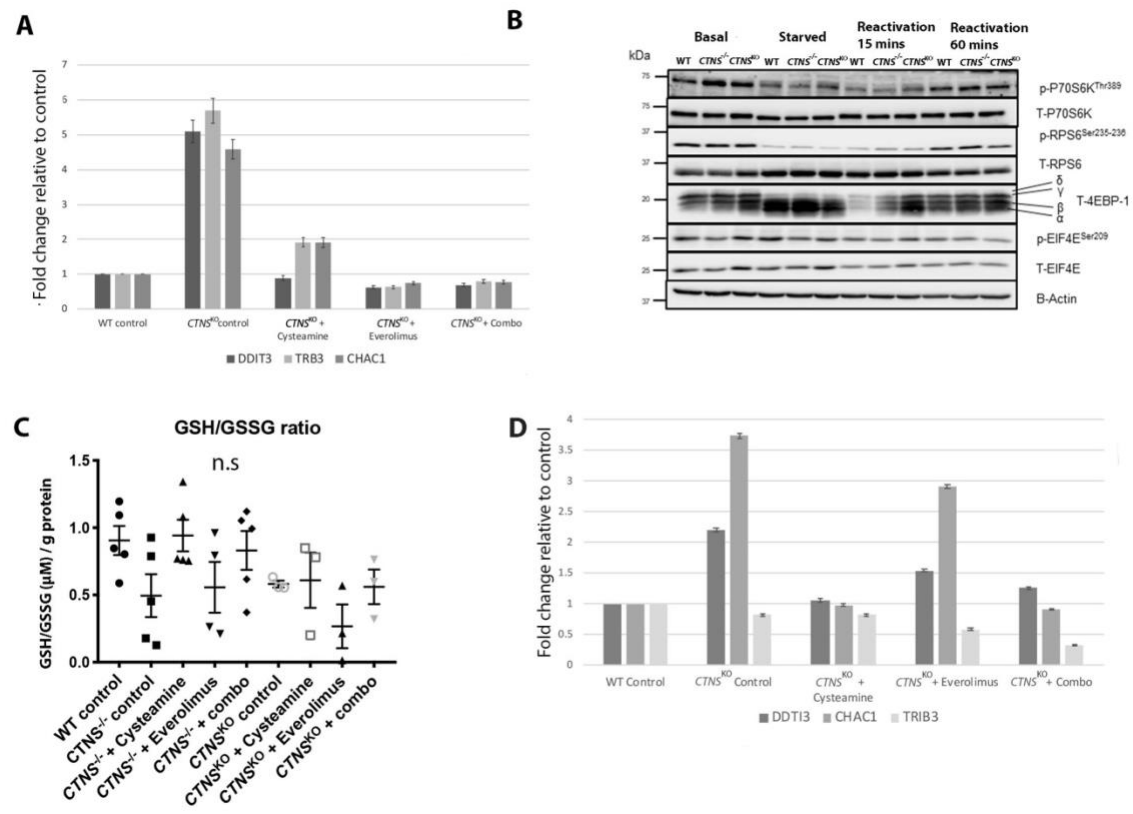

Supplemental Figure S4

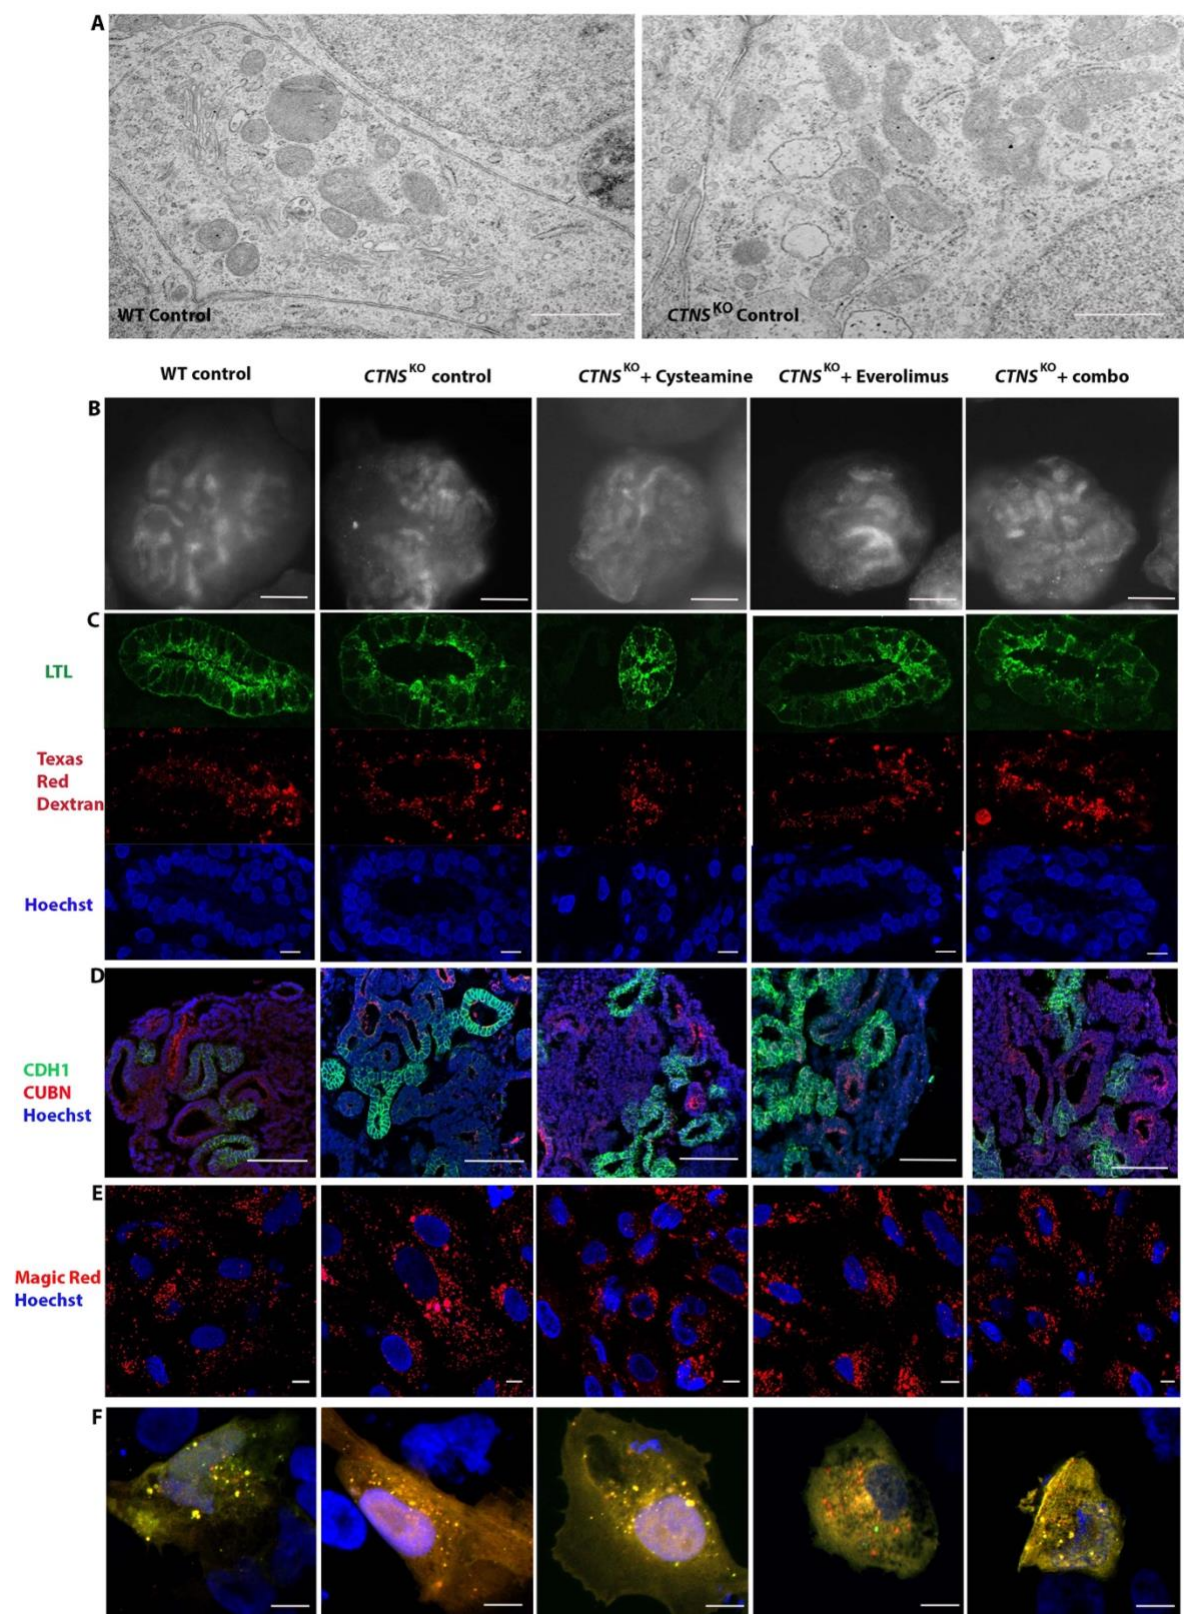

## Figure Legends:

### Supplemental Figure S1

(A, B) Percentage of yellow and red-only puncta in all three *CTNS*<sup>sko</sup> iPS cell lines compared to *CTNS*<sup>-/-</sup> and WT iPSCs. One-way ANOVA performed, \*\* $p < 0.01$ , \*\*\* $p < 0.001$ , data is plotted as mean  $\pm$  SEM, (n= 30 cells from 10 random fields per condition containing ~1-3 cells, 3 independent experiments). (C) Graph showing the average number of cells with lysosomes over 10  $\mu\text{m}^2$  in control *CTNS*<sup>-/-</sup> and all three *CTNS*<sup>sko</sup>-iPSCs. One-way ANOVA performed, non-significant, data plotted as mean  $\pm$  SEM, (n=300 cells from 5 random fields per condition, 20 cells/field, 3 independent experiments). (D) Amount of cystine (nmol/mg of protein) in WT and *CTNS*<sup>-/-</sup>-iPSCs with 10  $\mu\text{M}$ , 100  $\mu\text{M}$  or 1 mM cysteamine treatment for 1 hr. One-way ANOVA performed, \*\* $p < 0.01$ , data plotted as mean  $\pm$  SEM, 2 independent experiments. (E) Amount of cystine (nmol/mg of protein) in WT and *CTNS*<sup>-/-</sup>-iPSCs with 10  $\mu\text{M}$ , 100  $\mu\text{M}$  or 1 mM cysteamine treatment for 24 hr. One-way ANOVA performed, \*\*\* $p < 0.001$ , data plotted as mean  $\pm$  SEM, 2 independent experiments. (F) Graph showing the average number of lysosomes per cell in *CTNS*<sup>sko</sup> control and *CTNS*<sup>sko</sup> treated with 1 mM Cysteamine, 100 nM Everolimus or Combo- 1 mM Cysteamine and 100nm Everolimus for 24 hrs. One-way ANOVA performed, non-significant, data plotted as mean  $\pm$  SEM. (G, H, I, J) Representative images of fluorescent staining with Magic red in *CTNS*<sup>sko</sup>-iPSCs over expressing Cystinosin-GFP showing overlap, individual channels of DAPI, Cystinosin-GFP, Magic red and merge shown respectively. Scale bar 10  $\mu\text{m}$ . (K) Graph showing the total number of DQ-BSA<sup>+</sup> puncta in WT and *CTNS*-iPSCs incubated with 20  $\mu\text{g/ml}$  working solution of DQ-BSA green for 3 hrs. One-way ANOVA performed, non-significant, data plotted as mean  $\pm$  SEM. (L, M) Representative images of fluorescent staining with DQ-BSA in WT and *CTNS*-iPSCs. Scale bar 10  $\mu\text{m}$ . (N) Ratio of GSH/GSSG ( $\mu\text{M/g}$  of protein) in WT and *CTNS*<sup>-/-</sup> iPSCs and (O) WT and *CTNS*<sup>sko</sup> iPS with various treatments (1 mM Cysteamine, 100 nM Everolimus, Combo - 1

mM Cysteamine and 100nM Everolimus or 50mM sucrose for 24 hrs). One-way ANOVA performed, non-significant, data plotted as mean  $\pm$  SEM. **(P)** Graph showing the amount of ATP (nmol/mg of protein) in WT and *CTNS* iPSCs with various treatments (1 mM Cysteamine, 100 nM Everolimus, Combo - 1 mM Cysteamine and 100 nM Everolimus for 24 hrs). One-way ANOVA performed, non-significant, data plotted as mean  $\pm$  SEM. **(Q)** Graph showing the degree of apoptosis as determined by the percentage of GFP<sup>+</sup> puncta in WT and *CTNS*<sub>ko</sub>-iPSCs with various treatments (1 mM Cysteamine, 100 nM Everolimus, Combo - 1 mM Cysteamine and 100 nM Everolimus for 24 hrs). One-way ANOVA performed, \*\*p<0.01, \*\*\*\*p<0.0001, data is plotted as mean  $\pm$  SEM **(R, S)** Representative immunofluorescent staining with anti-TOM20 (red) in WT and *CTNS*<sup>-/-</sup> iPSCs. Scale bar 10  $\mu$ m. **(T,U)** Transmission electron micrograph (TEM) of WT and *CTNS*<sup>-/-</sup>-iPSCs mitochondria. Scale bars 1  $\mu$ m. One-way ANOVA performed, n.s: non-significant, \*p<0.5, \*\*p<0.01, \*\*\*p<0.001, \*\*\*\*p<0.0001 data plotted as mean  $\pm$  SEM.

**Supplemental Figure S2.** Top 50 differentially expressed genes in *CTNS*<sub>ko</sub>-iPSCs and isogenic WT control cells. (FDR<0.05)

**Supplemental Figure S3.** **(A)** Quantitative PCR with various treatments (1 mM Cysteamine, 100nM Everolimus, Combo - 1 mM Cysteamine and 100 nM Everolimus for 24 hrs) in *CTNS*<sub>ko</sub>-iPSCs expressed as fold change relative to control, data plotted as mean  $\pm$  SD **(B)** Representative Western blot against phosphorylated and total S6K, RPS6, 4EBP1, EIF4e under different feeding conditions in WT, *CTNS*<sup>-/-</sup> and *CTNS*<sub>ko</sub>-iPSCs (representative of 3 independent experiments). **(C)** Ratio of GSH/GSSG ( $\mu$ M/g of protein) in WT and *CTNS*<sup>-/-</sup> and *CTNS*<sub>ko</sub> organoids with various treatments (1 mM Cysteamine, 100 nM Everolimus, Combo - 1 mM Cysteamine and 100 nM Everolimus for 24 hrs). One-way ANOVA performed, non-

significant, data plotted as mean  $\pm$  SEM, n=3, 3 independent experiments. **(D)** Quantitative PCR with various treatments in *CTNS*<sup>ko</sup> organoids expressed as fold change relative to control, data plotted as mean  $\pm$  SD.

**Supplemental Figure S4 (A)** Transmission electron micrograph (TEM) of WT and *CTNS*<sup>ko</sup>-kidney organoids showing mitochondria. Scale bars 1  $\mu$ m. **(B)** Fluorescent whole-mount images of day 14 WT, *CTNS*<sup>ko</sup> control and *CTNS*<sup>ko</sup> kidney organoids treated with either 1 mM cysteamine, 100 nM Everolimus or combination for 24hrs incubated with 10 kDa Texas red-dextran for 48 hrs showing accumulation of dextran in tubules (representative of n=10 organoids). Scale bar 100  $\mu$ m. **(C)** Cross-section of a kidney organoid following 10k Da Texas red-dextran incubation showing uptake of the dextran (red) into LTL<sup>+</sup> proximal tubules (green; representative of n=8 organoids). Scale bar 10  $\mu$ m. **(D)** Immunofluorescent staining of paraffin sections of day 14 organoids showing CUBILIN (red) and CDH1 (green) labelled distal tubules. Nuclei stained with Hoechst 33342. Scale bar 100  $\mu$ m. **(E)** Representative images of fluorescent staining with Magic red in WT control, and *CTNS*<sup>ko</sup> – kidney organoids with treatments (1 mM Cysteamine, 100 nM Everolimus, Combo - 1 mM Cysteamine and 100 nM Everolimus for 24 hrs). Scale bar 10  $\mu$ m. **(F)** Dissociated organoids from WT control, *CTNS*<sup>ko</sup> control and *CTNS*<sup>ko</sup> – kidney organoids with treatments (1 mM Cysteamine, 100 nM Everolimus, Combo - 1 mM Cysteamine and 100 nM Everolimus for 24 hrs) transfected with tandem mCherry-LC3B-GFP plasmid showing red and yellow puncta. Scale bar 10  $\mu$ m.

## Supplemental Information:

*Supplemental Table 1. Primary antibodies*

| Primary Antibody                         | Source          | Product code | Dilution used |
|------------------------------------------|-----------------|--------------|---------------|
| Rabbit anti-LC3B                         | Cell signalling | 3868S        | 1:1000        |
| Rabbit anti-P70 S6 kinase                | Cell signalling | 2708S        | 1:1000        |
| Rabbit anti-P-p70 S6 kinase (T389)       | Cell signalling | 9205S        | 1:500         |
| Rat anti-LAMP1                           | Abcam           | Ab25245      | 1:100         |
| Mouse-anti $\beta$ -actin                | Sigma           | A1978        | 1:20,000      |
| Rabbit anti-CUBILIN                      | Abcam           | Ab244274     | 1:500         |
| Mouse anti- ECADHERIN                    | BD Biosciences  | 610181       | 1:300         |
| Rabbit anti p-RPS6 <sup>Ser235-236</sup> | Cell signalling | 4856         | 1:1000        |
| Mouse anti-RPS6                          | Cell signalling | 2317         | 1:1000        |
| Rabbit anti-4EBP-1                       | Cell signalling | 9644         | 1:1000        |
| Rabbit anti p-EIF4e <sup>Ser209</sup>    | Cell signalling | 9741         | 1:1000        |
| Rabbit anti-EIF4e                        | Cell signalling | 9742         | 1:2000        |

*Supplemental Table 2. Secondary antibodies for western blot and immunohistochemistry*

| Secondary Antibody       | Source     | Product code | Dilution |
|--------------------------|------------|--------------|----------|
| Goat anti-Rabbit IgG-HRP | Santa Cruz | Sc-2054      | 1:20,000 |
| Anti-mouse IGg           | Sigma      | A9044        | 1:20,000 |

|                                    |             |         |       |
|------------------------------------|-------------|---------|-------|
| <b>Anti- rat Alexa Fluor 488</b>   | Invitrogen  | A-21210 | 1:500 |
| <b>Anti-Mouse Alexa Fluor 488</b>  | Abcam       | 96871   | 1:600 |
| <b>Anti-Rabbit Alexa Fluor 594</b> | Abcam       | 96901   | 1:600 |
| <b>LTL</b>                         | Vector Labs | FL-1321 | 1:300 |

**Supplemental Table 3. List of primers for qPCR**

| <b>Gene</b>  | <b>Forward primer 5'-3'</b> | <b>Reverse primer 5'-3'</b>  |
|--------------|-----------------------------|------------------------------|
| <b>DDIT3</b> | AGAACCAGGAAACGGAAACAGA      | TCTCCTTCATGCGCTGCTTT         |
| <b>CHAC1</b> | GCCCTGTGGATTTTCGGGTA        | ATCTTGTCGCTGCCCCCTATG        |
| <b>TRB3</b>  | CCCACCTACTGCTCCAGATCGTGCAA  | CCTGGACGGGGTACACCTTGCAGGTATA |
| <b>CUBN</b>  | CTTGCAGCAGACTGTTGACAA       | TGGCAGCTCAAGGGTGTTC          |
| <b>LRP2</b>  | AAATTGAGCACAGCACCTTTGA      | TCTGCTTTCCTGACTCGAATAATG     |

**Supplemental Table 4. Average numerical values of cystine measurements and protein concentration of iPSCs and kidney organoids.**

| <b>Sample iPSCs</b>                    | <b>Cystine (nmol)</b> | <b>Protein (mg)</b> | <b>Cystine (nmol/mg of protein)</b> |
|----------------------------------------|-----------------------|---------------------|-------------------------------------|
| <b>WT control</b>                      | 109.230               | 1750                | 0.04547 ± 0.01                      |
| <b>WT + sucrose</b>                    | 79.282                | 1400                | 0.04224 ± 0.001                     |
| <b>CTNS<sup>-/-</sup> control</b>      | 1949.671              | 1100                | 1.494 ± .325                        |
| <b>CTNS<sup>-/-</sup> + Cysteamine</b> | 42.578                | 760                 | 0.04933 ± 0.026                     |
| <b>CTNS<sup>-/-</sup> + Everolimus</b> | 2586.966              | 800                 | 2.340 ± 0.15                        |
| <b>CTNS<sup>-/-</sup> + combo</b>      | 43.825                | 600                 | 0.05478 ± 0.006                     |
| <b>CTNS<sup>ko</sup> control</b>       | 4887.667              | 1500                | 2.454 ± 0.375                       |
| <b>CTNS<sup>ko</sup> + Cysteamine</b>  | 75.591                | 1400                | 0.04212 ± 0.0068                    |
| <b>CTNS<sup>ko</sup> + Everolimus</b>  | 4986.704              | 1500                | 2.354 ± 0.21                        |
| <b>CTNS<sup>ko</sup> + combo</b>       | 100.475               | 1600                | 0.04622 ± 0.004                     |

| <b>Sample Organoids</b>                | <b>Cystine (nmol)</b> | <b>Protein (mg)</b> | <b>Cystine (nmol/mg of protein)</b> |
|----------------------------------------|-----------------------|---------------------|-------------------------------------|
| <b>WT control</b>                      | 907.974               | 3500                | 2.487 ± 0.89                        |
| <b>CTNS<sup>-/-</sup> control</b>      | 763.384               | 900                 | 9.154 ± 0.78                        |
| <b>CTNS<sup>-/-</sup> + Cysteamine</b> | 112.879               | 900                 | 1.320 ± .13                         |
| <b>CTNS<sup>-/-</sup> + Everolimus</b> | 844.265               | 660                 | 15.32 ± 2.01                        |
| <b>CTNS<sup>-/-</sup> + combo</b>      | 142.023               | 700                 | 1.89 ± 0.27                         |
| <b>CTNS<sup>sko</sup> control</b>      | 2085.588              | 2500                | 8.983 ± 3.39                        |
| <b>CTNS<sup>sko</sup> + Cysteamine</b> | 137.593               | 2000                | 0.6812 ± 0.03                       |
| <b>CTNS<sup>sko</sup> + Everolimus</b> | 2965.880              | 2600                | 11.48 ± 0.51                        |
| <b>CTNS<sup>sko</sup> + combo</b>      | 141.991               | 1800                | 0.7866 ± 0.03                       |
